# Supplementary material
Source: PubMed Central journal article supplement (PMC4567628)
Supplement: IAI.00184-15_zii999091393so1.pdf [file IAI.00184-15_zii999091393so1.pdf]

**S1. Similar like that of *LdWT* parasites, add back parasites (*Ldp27*<sup>-/-</sup>*AB*, *LdCen*<sup>-/-</sup>*AB*) significantly abrogated the pro-inflammatory cytokines along with the up regulation of the anti-inflammatory cytokine in BMDM *in vitro* compared to live attenuated parasite infection**

The pattern of pro-inflammatory cytokines (TNF- $\alpha$ , IFN- $\gamma$ , IL-12) (S1A-C) and anti-inflammatory cytokine (IL-10) production (S1D) by BMDM infected with add back parasites was similar to those infected with *LdWT* parasites in response to LPS or r-IFN $\gamma$ . These data indicate that increased pro-inflammatory response and attenuated anti-inflammatory response by *Ldp27*<sup>-/-</sup> and *LdCen1*<sup>-/-</sup> parasite infection is related to deficiency of *Ldp27* and *Centrin1* genes respectively.

#### **Methods:**

##### **Cytokine enzyme-linked immunosorbent assay (ELISA):**

The conditioned medium of macrophage culture after infection with *LdWT*, live attenuated and add back parasites were assayed for mouse cytokines with use of the sandwich ELISA kit (ebioscience). The assay was performed according to the manufacturer's instructions.

Figure S1

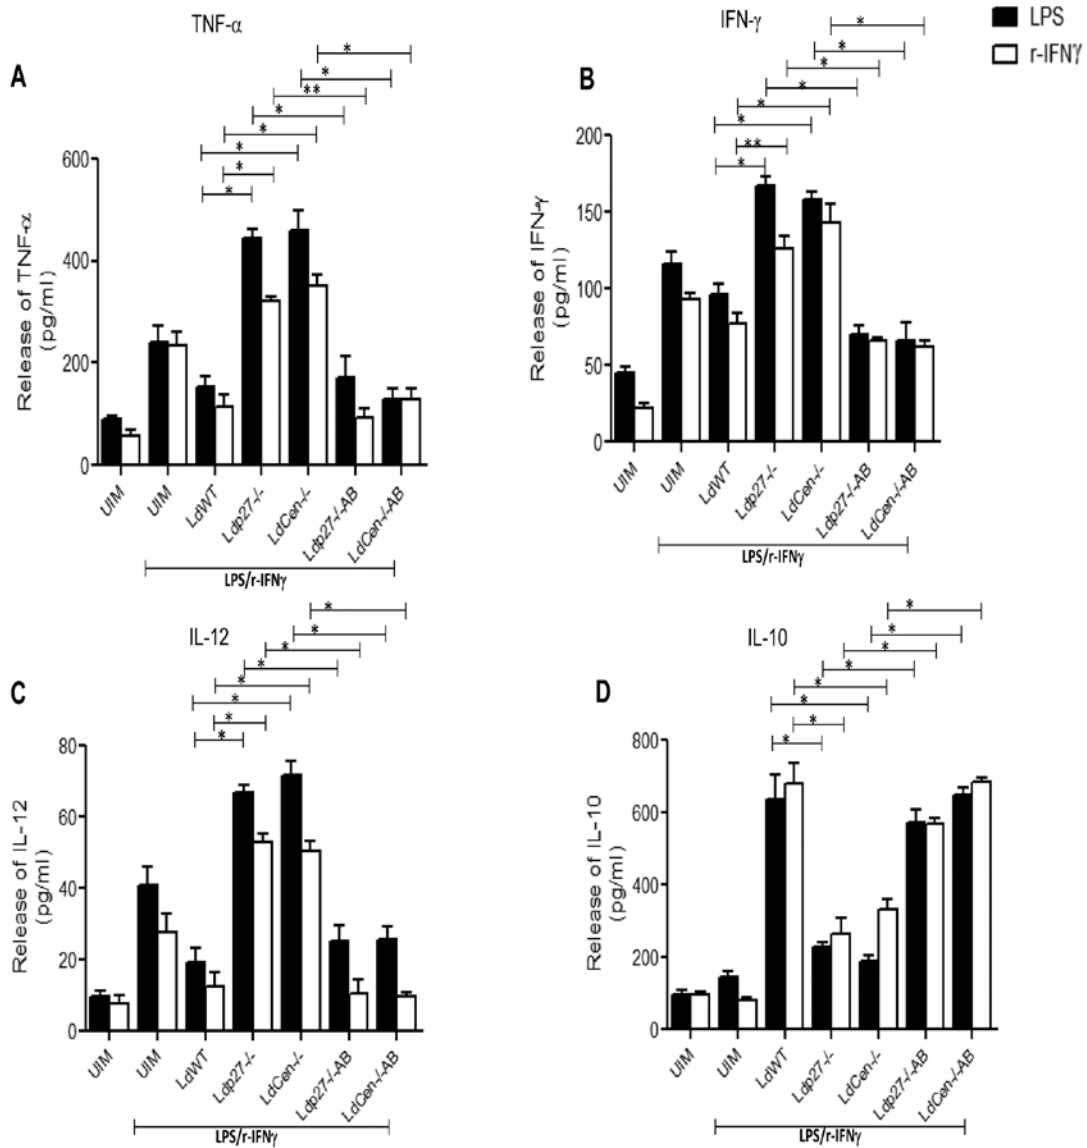

## Figure legend

**S1. Similar like that of *LdWT* parasites, gene complemented add back parasites (*Ldp27*<sup>-/-</sup>*AB*, *LdCen*<sup>-/-</sup>*AB*) down-regulate the pro-inflammatory cytokine generation in BMDM thereby reversing the effects of live attenuated parasites (*Ldp27*<sup>-/-</sup>, *LdCen*<sup>-/-</sup>)**

BMDM were either left uninfected or infected with opsonized *LdWT*, live attenuated parasites (*Ldp27*<sup>-/-</sup>, *LdCen*<sup>-/-</sup>) or gene complemented add back parasites (*Ldp27*<sup>-/-</sup>*AB*, *LdCen*<sup>-/-</sup> *AB*) (5:1, parasite to macrophage ratio), washed after 6h and treated with or without LPS at a dose of 1µg/ml or r-IFN $\gamma$  (100U/ml) for 24h. After 24h the levels of (A) TNF- $\alpha$  (B) IL-12 (C) IFN- $\gamma$  (D) IL-10 in the culture supernatant was evaluated by sandwich ELISA. ELISA data are expressed as means  $\pm$  SD of values from triplicate experiments that yielded similar results. \*P<0.05, \*\*P<0.005.
